# Supplementary material for: Involvement of ILC1-like innate lymphocytes in human autoimmunity, lessons from alopecia areata
Source: eLife. 2023 Mar 17;12:e80768. doi: 10.7554/eLife.80768 (PMC10023162; doi:10.7554/eLife.80768)
Supplement: Figure 1—source data 1. [file elife-80768-fig1-data1.xlsx]

## Sheet: Sheet1
Figure 1
Figure 1D
						Normal human scalp skin								AA patient lesional intra follicular										AA patient lesional peri follicular												AA patient Non-lesional intra follicular											AA patient Non-lesional peri follicular
					Eomes+CD49A+NKG2D+									Eomes+CD49A+NKG2D+											Eomes+CD49A+NKG2D+											Eomes+CD49A+NKG2D+											Eomes+CD49A+NKG2D+
Donor 1	0	0	0	0	0	0	0	0	0		Donor 1	2	1	1	0	1	0	2	0	0		Donor 1	3	3	2	1	1	2	4	2	1		Donor 1	0	0	0	1	1	0	0	0	0		Donor 1	0	0	0	0	1
Donor 2	0	0	0	0	0	0	0	0	0		Donor 2	2	2	1	1	0	3	2	0	0		Donor 2	2	2	4	0	1	1	2	3	0		Donor 2	1	0	0	0	0	0	1	1	0		Donor 2	1	1	1	2	1
Donor 3	0	0	0	0	0	0	0	0	0		Donor 3	2	5	4	3	0	0	0	0	1		Donor 3	2	3	2	0	2	0	2	3	1		Donor 3	1	0	0	0	0	0	0	0	0		Donor 3	1	1	1	1	2
Donor 4	0	0	2	0	0	0	0	0	0		Donor 4	1	0	1	2	0	0	4	3	2		Donor 4	2	3	4	3	2	0	3	4	1		Donor 4	0	0	0	0	0	0	0	0	1		Donor 4	0	1	0	1	1
Donor 5	0	0	0	0	0	0	0	3	0		Donor 5	0	4	2	0	0	0	0	0	0		Donor 5	1	1	2	2	1	1	0	3	2		Donor 5	0	0	0	0	0	1	1	0	0		Donor 5	1	1	1	1	0
Donor 6	0	0	0	0	4	0	0	0	0		Donor 6	4	3	3	2	2	1	1	0	0		Donor 6	2	3	4	0	0	1	4	0	3		Donor 6	1	1	0	0	0	0	1	1	0		Donor 6	2	2	1	0	0
					Eomes+CD49A+ckit-									Eomes+CD49A+ckit-											Eomes+CD49A+ckit-											Eomes+CD49A+ckit-											Eomes+CD49A+ckit-
Donor 1	3	0	0	0	0	2	0	0	0		Donor 1	2	2	1	1	1	0	1	1	1		Donor 1	2	1	1	2	2	3	1	1	3		Donor 1	2	0	0	0	0	1	0	0	0		Donor 1	1	1	2	1	0
Donor 2	0	0	0	0	0	0	0	0	0		Donor 2	0	0	1	0	0	0	0	0	0		Donor 2	1	5	2	3	3	3	1	1	2		Donor 2	0	0	0	0	0	0	0	0	0		Donor 2	1	1	2	0	0
Donor 3	0	0	0	0	0	0	0	0	0		Donor 3	1	1	1	0	1	1	1	1	2		Donor 3	1	1	2	0	0	2	2	2	2		Donor 3	0	0	0	0	0	0	0	0	1		Donor 3	2	1	1	0	1
Donor 4	0	0	0	0	0	0	0	0	1		Donor 4	0	1	1	1	1	0	1	1	1		Donor 4	2	2	1	2	1	2	1	3	1		Donor 4	0	0	0	0	0	0	1	0	0		Donor 4	0	1	1	3	0
Donor 5	0	0	0	0	0	0	3	2	2		Donor 5	1	0	1	1	1	0	1	0	0		Donor 5	2	3	3	2	1	1	1	2	1		Donor 5	0	0	0	0	0	0	0	0	0		Donor 5	2	2	2	0	0
Donor 6	2	2	0	0	0	0	0	0	0		Donor 6	3	2	2	2	2	2	0	0	0		Donor 6	0	2	1	2	2	2	2	1	2		Donor 6	1	0	0	0	0	0	0	2	0		Donor 6	0	1	0	0	1
					NKp44+CD103+Tbet-									NKp44+CD103+Tbet-											NKp44+CD103+Tbet-											NKp44+CD103+Tbet-											NKp44+CD103+Tbet-
Donor 1	0	0	0	0	0	0	0	0	0		Donor 1	2	2	1	0	1	2	1	2	2		Donor 1	2	5	3	3	2	4	5	5	4		Donor 1	1	1	1	0	0	1	1	1	1		Donor 1	2	0	1	0	0
Donor 2	0	0	0	0	0	0	0	0	0		Donor 2	0	0	0	0	2	1	2	2	2		Donor 2	3	3	3	2	1	4	4	5	2		Donor 2	0	0	0	0	0	1	1	1	0		Donor 2	1	1	1	2	0
Donor 3	0	0	0	0	0	0	0	0	0		Donor 3	0	2	1	2	2	1	2	2	2		Donor 3	3	5	2	6	5	5	1	3	4		Donor 3	0	0	1	1	1	1	1	0	0		Donor 3	2	1	2	1	2
Donor 4	0	0	0	1	0	0	0	0	0		Donor 4	3	3	2	1	1	1	1	0	1		Donor 4	4	5	7	5	1	5	3	4	4		Donor 4	0	0	0	0	0	0	0	1	0		Donor 4	2	0	1	1	1
Donor 5	1	1	0	1	0	0	0	0	0		Donor 5	3	2	2	3	4	1	2	1	1		Donor 5	2	5	3	1	1	1	2	3	1		Donor 5	0	0	0	0	0	0	0	0	0		Donor 5	2	1	2	0	0
Donor 6	0	0	0	1	1	1	0	0	0		Donor 6	2	2	1	1	1	1	2	1	1		Donor 6	1	0	0	1	2	4	5	4	5		Donor 6	0	0	0		0	0	0	0	0		Donor 6	1	0	2	2	0
Figure 1 F
				CD8/NKG2D										CD8/NKG2D													CD8/NKG2D
				AA patient										AA patient													Normal scalp skin
				Intrafollicular										Perifollicular
Donor 1	2	3	2	1	1	2	1	4	1		Donor 1	9	5	4	7	10	5	9	9	4		Donor 1	0	0	1	1	0	0	0	0	0
Donor 2	7	3	4	2	3	4	3	2	3		Donor 2	6	6	8	7	4	4	13	4	8		Donor 2	0	0	0	0	0	0	1	0	0
Donor 3	3	4	4	1	3	3	5	3	5		Donor 3	9	8	9	8	7	7	2	2	9		Donor 3	0	0	0	0	0	0	0	2	0
Donor 4	4	7	6	6	1	4	4	4	3		Donor 4	9	7	4	10	7	8	6	9	6		Donor 4	1	0	0	0	0	1	1	1	0
Donor 5	4	4	4	3	6	1	2	4	6		Donor 5	11	6	12	7	4	8	9	11	8		Donor 5	0	0	0	0	0	0	0	0	1
Donor 6	2	3	3	3	3	4	6	3	4		Donor 6	4	4	9	8	9	9	10	4	6		Donor 6	0	0	0	1	0	1	0	0	0
[truncated: 4 more columns]
