# Supplementary material for: Involvement of ILC1-like innate lymphocytes in human autoimmunity, lessons from alopecia areata
Source: eLife. 2023 Mar 17;12:e80768. doi: 10.7554/eLife.80768 (PMC10023162; doi:10.7554/eLife.80768)
Supplement: Figure 2—source data 1. [file elife-80768-fig2-data1.xlsx]

## Sheet: Sheet1
Figure 2
	% Eomes+T-bet- gated on CRTH2- and Nkp44-
	Stimulated PBMCs		unstimulated PBMCs
Donor1	99		5
Donor2	89		9
Donor3	94		21
Donor4	98		17
Donor5	100		19
Donor6	88		21
Donor7	99		4
Donor8	98		1
Donor9	97		3
Donor10	71		14
