# Supplementary material for: Involvement of ILC1-like innate lymphocytes in human autoimmunity, lessons from alopecia areata
Source: eLife. 2023 Mar 17;12:e80768. doi: 10.7554/eLife.80768 (PMC10023162; doi:10.7554/eLife.80768)
Supplement: Figure 3—source data 1. [file elife-80768-fig3-data1.xlsx]

## Sheet: Sheet1
Figure3
	Hair follcile							PBMC/PHA								CD8/NKG2D								ILC1-like cells							ILC2								ILC3
					No hair				With hair				No hair					With hair			No hair					With hair			No hair					With hair			No hair					With hair
Donor1	0.36	0.2	0.3		0.2	0.25	0.19		0.24	0.29	0.19		0.34	0.31	0.24		0.54	0.48	0.377		0.189	0.254	0.278		0.69	0.567	0.681		0.167	0.217	0.25		0.241	0.289			0.231	0.251	0.202		0.19	0.26	0.287
Donor2	0.3	0.2	0.3		0.27	0.27	0.19		0.32	0.31	0.32		0.299	0.28	0.29		0.39	0.45	0.432		0.22	0.25	0.16		0.68	0.62	0.59		0.23	0.26	0.22		0.27	0.25	0.21		0.232	0.245	0.25		0.301	0.289	0.233
Donor3	0.27	0.3	0.3		0.29	0.28	0.22		0.32	0.37	0.28		0.3	0.321	0.26		0.51	0.42	0.39		0.153	0.199	0.23		0.599	0.615	0.68		0.19	0.25	0.23		0.21	0.31	0.18		0.229	0.24	0.28		0.268	0.4	0.32
