# Supplementary material for: Involvement of ILC1-like innate lymphocytes in human autoimmunity, lessons from alopecia areata
Source: eLife. 2023 Mar 17;12:e80768. doi: 10.7554/eLife.80768 (PMC10023162; doi:10.7554/eLife.80768)
Supplement: Figure 4—source data 1. [file elife-80768-fig4-data1.xlsx]

## Sheet: Sheet1
Figure 4
Figure4G
							Number of melanin clumps
		ILC1						PBMCs/PHA						CD8/NKG2D
Donor1	5	8	4	7		Donor1	1	2	2	1		Donor1	6	8	9
Donor2	9	8	7			Donor2	1	2	3	2		Donor2	2	5	4	6
Donor3	5	5	6			Donor3	2	1				Donor3	8	9	3	4
Figure 4K
			PBMCs/PHA									ILC1									CD8/NKG2D
		Ki-67				TUNEL					Ki-67				TUNEL					Ki-67				TUNEL
Donor1	74	85	67		9	9	4		Donor1	2	2	3		65	67	40		Donor1	2	3	4		56	81	67
Donor2	32	78	69		11	12	12		Donor2		3	2		71	32	68		Donor2	5	2	1		46	61	75
