# Supplementary material for: Involvement of ILC1-like innate lymphocytes in human autoimmunity, lessons from alopecia areata
Source: eLife. 2023 Mar 17;12:e80768. doi: 10.7554/eLife.80768 (PMC10023162; doi:10.7554/eLife.80768)
Supplement: Figure 5—source data 1. [file elife-80768-fig5-data1.xlsx]

## Sheet: Sheet1
Figure 5
Figure 5 F				MICA
				Vehicle											PBMCs/PHA										ILC3											ILC1											ILC1/NKG2D
Donor 1	8	13	15	12	7	10	8	6	10		Donor 1	13	15	14	16	12	17	12	14		Donor 1	21	18	18	12	16	12	18	17	15		Donor 1	54	58	46	48	45	45	41	60	46		Donor 1	23	15	16	19	24	24
Donor 2	12	15	15	13	12	18	14				Donor 2	14	21	19	18	15	18	9	13		Donor 2	22	17	21	17	10	21	17	17	19		Donor 2	56	52	50	53	59	45	43	51			Donor 2	10	11	19	21	18
Donor 3	14	15	11	9	9	10	14	12	13		Donor 3	10	14	14	15	21	13	12	14		Donor 3	18	21	16	19	15	28	24	21	18		Donor 3	53	48	47	45	75	54	45	53			Donor 3	16	21	23	21	23
				HLA ABC
				Vehicle											PBMCs/PHA										ILC3											ILC1											ILC1/NKG2D
Donor 1	19	17	23	25	21	17	19	20			Donor 1	14	21	14	12	10	11	11	9		Donor 1	23	24	23	21	20	19	15	19			Donor 1	62	65	56	56	59	63	61	68			Donor 1	12	7	28	30	25	19
Donor 2	16	21	23	28	21	16	10	11			Donor 2	10	16	14	20	18	16	15	8		Donor 2	17	18	26	21	28	19	14	19			Donor 2	53	59	64	68	56	58	60	60			Donor 2	49	39	23	20	14	17
Donor 3	15	18	18	17	16	19	20	20	21		Donor 3	18	13	26	26	13	11	9	10		Donor 3	19	24	25	18	21	20	25				Donor 3	61	54	60	68	67	64	60	63	64		Donor 3	29	49	26	5	31	34
				HLADR
				Vehicle											PBMCs/PHA										ILC3											ILC1											ILC1/NKG2D
Donor 1	18	21	16	16	14	10	14	18	21		Donor 1	20	19	20	15	16	14				Donor 1	18	18	29	24	27	15	21	27	23		Donor 1	76	68	79	21	70	62	73	78	67		Donor 1	17	28	17	32	21	18
Donor 2	17	14	19	10	10	17	18	14	17		Donor 2	15	17	28	23	20	16	18			Donor 2	19	14	10	20	21	23	16	14			Donor 2	68	80	73	45	70	69	61	65	69		Donor 2	18	24	21	19	4	71
Donor 3	15	18	15	19	21	16	16	15	17		Donor 3	16	18	21	20	19	17	18			Donor 3	25	27	18	32	32	15	12	10			Donor 3	71	70	75	79	81	69	70	75	66		Donor 3	27	23	14	20	32	26
				CD1d
				Vehicle											PBMCs/PHA										ILC3											ILC1											ILC1/NKG2D
Donor 1	32	26	28	32	39	23	30	32	32		Donor 1	16	22	24	20	21	20				Donor 1	16	10	26	34	23	25	18	23	28		Donor 1	53	54	57	45	49	53	58	51			Donor 1	10	16	21	25	21	29
Donor 2	32	34	28	29	30	32	21	34			Donor 2	23	21	25	18	18	21	20			Donor 2	20	23	29	20	17	21	32	30	12		Donor 2	55	49	58	58	54	51	57	45	42		Donor 2	21	26	26	22	29	30
Donor 3	34	30	29	28	30	32					Donor 3	21	24	23	26	19	23	26			Donor 3	25	21	23	30	18	10					Donor 3	45	48	57	59	60	61	63	56	55		Donor 3	24	27	21	23	18	19
Figure 5 I
				MSH
				Vehicle											PBMCs/PHA										ILC3											ILC1											ILC1/NKG2D
Donor 1	32	34	37	16	32	18	34	28			Donor 1	26	29	32	37	19	23	43	32		Donor 1	23	18	23	26	15	12	14	19	21		Donor 1	3	8	8	8	5	6	10	1	4		Donor 1	30	38	45	40	41	48
Donor 2	32	36	41	39	26	30	36	37	29		Donor 2	20	20	19	32	30	26	23			Donor 2	21	10	23	12	14	32	35	21	23		Donor 2	5	0	4	3	8	6	7	8	6		Donor 2	45	23	40	31	45	38
Donor 3	34	34	31	30	27	29	35	38			Donor 3	24	26	28	19	31	26	32	21		Donor 3	15	14	19	23	24	21	30	21	10		Donor 3	8	10	12	10	6	9	9	8	5		Donor 3	35	39	40	31	39	24
				TGFBeta
				Vehicle											PBMCs/PHA										ILC3											ILC1											ILC1/NKG2D
Donor 1	39	42	43	25	45	23	34	29	30		Donor 1	34	37	39	40	39	23	18	37		Donor 1	34	37	32	19	49	38	40	45			Donor 1	9	12	10	6	19	10	7	7			Donor 1	32	37	12	16	25	30
Donor 2	39	40	50	42	37	39	35	30	39		Donor 2	41	40	43	33	38	40	43			Donor 2	35	45	49	40	36	40	43	59			7	8	12	12	15	10	6	8	7	9		Donor 2	30	10	5	23	24	27
Donor 3	40	20	32	38	34						Donor 3	40	35	38	37	34	40				Donor 3	39	39	40	35	42	48	45				Donor 3	10	10	13	10	12	15	9	6	8		Donor 3	54	8	43	38	43	45
[truncated: 13 more columns]
