# Supplementary material for: Involvement of ILC1-like innate lymphocytes in human autoimmunity, lessons from alopecia areata
Source: eLife. 2023 Mar 17;12:e80768. doi: 10.7554/eLife.80768 (PMC10023162; doi:10.7554/eLife.80768)
Supplement: Figure 6—source data 1. [file elife-80768-fig6-data1.xlsx]

## Sheet: Sheet1
Figure 6
Figure 6A
	%Vehicle (Control)		%Vehicle (PHA)		ILC2		ILC3		ILC1		Anti NKG2D		IFNgamma		CD8/NKG2D
Donor1	14		27		23		21		50		32		25		51
Donor2	0		10		19		23		54		39		23		59
Donor3	23		5		23		26		85		42		20		67
Donor4	4		15		16		20		72		45		24		63
Donor5	6		8		26		39		63		40		29		60
Donor6	21		18		28		32		74		30		28		65
Figure 6B
	PBMCs/PHA	CD8/NKG2D	ILC-1	ILC2	ILC3
Donor1	250	470	647	180	220
Donor2	240	380	651	190	260
Donor3	60	439	180	240	240
Donor4	190	391	590	320	310
Donor5	85	260	820	200	220
Donor6	145	420	610	120	300
Figure 6C
	ILC1	CD8/NKG2D
Donor1	94	65
Donor2	98	80
Donor3	87	77
Donor4	98	67
Donor5	91	76
Donor6	89	83
