# Supplementary material for: Involvement of ILC1-like innate lymphocytes in human autoimmunity, lessons from alopecia areata
Source: eLife. 2023 Mar 17;12:e80768. doi: 10.7554/eLife.80768 (PMC10023162; doi:10.7554/eLife.80768)
Supplement: Figure 7—figure supplement 1—source data 1. [file elife-80768-fig7-figsupp1-data1.xlsx]

## Sheet: Sheet1
Supp Figure2A
		ILC1 day0					ILC1day40						ILC1OKT day0					ILC1OKTday40						CD8NKG2D day0					CD8NKG2 day40						CD8NKG2DOKT day0					CD8NKG2OKT day40
Donor1	9	12				5	5				Donor1	6	9				4	4				Donor1	8	9				5	4				Donor1	8	9				9	7
Donor2	7	6	8			5	5	5			Donor2	6	7	6			4	4	3			Donor2	9	11	12			3	4	6			Donor2	8	9	8			7	5	7
Supp Figure 2G
				HLA ABC
		ILC1											ILC1 OKT											NKG2D											NKG2DOKT
Donor1	54	58	45	67	23	40	51	60	70		Donor1	56	78	34	38	49	58	13	45			Donor1	60	65	67	45	70	54	76	54			Donor1	4	9	10	11	9	4	5	7
Donor2	78	60	56	40	50	50	23	35	65		Donor2	36	40	54	52	50	40	43	21			Donor2	58	14	21	56	76	20	70				Donor2	4	2	12	11	9	5
				HLA DR
		ILC1											ILC1 OKT											NKG2D											NKG2DOKT
Donor1	76	14	60	34	38	34	54	51	23		Donor1	34	32	12	54	67	42	43				Donor1	59	32	87	90	89	34	10	50			Donor1	12	10	13	10	9	8
Donor2	9	55	65	23	29	39	65	76	50		Donor2	15	32	65	45	67	34	41				Donor2	30	67	56	21	54	62	86	43			Donor2	6	11	10	12	12	7
				MSH
		ILC1											ILC1 OKT											NKG2D											NKG2DOKT
Donor1	2	4	5	2	3	3	2	1			Donor1	2	2	3	4	3	3					Donor1	5	7	6	8	5	5	6				Donor1	37	20	16	23	34	21	25
Donor2	2	3	3	3	4	5	4	1			Donor2	4	4	1	2	2	3	1	2			Donor2	9	5	5	6	7	8					Donor2	23	43	28	12	20	32
				TGFBeta
		ILC1											ILC1 OKT											NKG2D											NKG2DOKT
Donor1	1	0	0	1	2	3	3	3			Donor1	0	2	5	5	4	2	1	0			Donor1	2	2	1	0	1	1	2	1			Donor1	34	23	12	29	10	23	26	19
Donor2	4	3	2	2	2	2	4	3			Donor2	4	3	4	3	1	1	3	3			Donor2	3	2	3	3	2	2	3	2			Donor2	20	19	24	18	18	19	25	21
				IFN
		ILC1											ILC1 OKT											NKG2D											NKG2DOKT
Donor1	21	23	19	14	19	23	10	9	11		Donor1	10	9	11	14	12	21	19	26			Donor1	23	16	12	19	40	20	24	24			Donor1	2	2	1	2	1	3	0	1
Donor2											Donor2	15	12	17	13	16	19					Donor2	15	17	16	21	2	18	12	19			Donor2	2	3	2	3	3	0	2	2
