# Supplementary material for: Involvement of ILC1-like innate lymphocytes in human autoimmunity, lessons from alopecia areata
Source: eLife. 2023 Mar 17;12:e80768. doi: 10.7554/eLife.80768 (PMC10023162; doi:10.7554/eLife.80768)
Supplement: Figure 7—figure supplement 2—source data 1. [file elife-80768-fig7-figsupp2-data1.xlsx]

## Sheet: Sheet1
Supp Figure3E
				CD8
		ILC1											ILC1 OKT											NKG2D											NKG2DOKT
Donor1	2	1	2	2	2	1	1	2			Donor1	2	0	1	0	0	1	1	1			Donor1	5	6	9	10	12	7	15	12			Donor1	0	0	1	1	1	1	1	2
Donor2	1	2	0	2	1	1	2	2	2		Donor2	1	1	1	1	0	1	0	0			Donor2	16	9	5	16	11	10	14	6			Donor2	1	1	1	1	1	1	1	1
				CD4
		ILC1											ILC1 OKT											NKG2D											NKG2DOKT
Donor1	1	2	1	1	1	1	1	1	0		Donor1	1	1	1	1	2	1	1	2			Donor1	4	6	9	5	9	6	8	10			Donor1	1	1	0	2	1	1	0	0
Donor2	2	2	2	2	1	1	1	1			Donor2	2	2	1	1	1	1	1	2			Donor2	9	12	10	6	4	6	5	6			Donor2	2	1	3	1	0	0	1	0
