# Supplementary material for: Involvement of ILC1-like innate lymphocytes in human autoimmunity, lessons from alopecia areata
Source: eLife. 2023 Mar 17;12:e80768. doi: 10.7554/eLife.80768 (PMC10023162; doi:10.7554/eLife.80768)
Supplement: Figure 7—figure supplement 3—source data 1. [file elife-80768-fig7-figsupp3-data1.xlsx]

## Sheet: Sheet1
Supp Figure4
Supp Figure4D
				IFN-gamma
		ILC1																	CD8/NKG2D																	PBMCPHA
Donor1	12	14	12	18	19	21	20	10	11	5	14	9	6	12	21		Donor1	9	12	17	21	24	18	14	21	20	15	11	15	24	13	18		Donor1	0	0	0	1	2	1	0	2	1	2	2	0	0	1
Donor2	17	19	13	12	10	23	20	15	17	19	15	23	10	16			Donor2	9	10	24	21	21	17	20	21	16	14	18	19	21	29	21		Donor2	2	1	1	1	1	0	1	1	2	0	1	1	1	1
				CD4
		ILC1																	CD8/NKG2D																	PBMCPHA
Donor1	0	0	4	1	4	2	2	3	1	1	3	3	2	2	3		Donor1	7	8	10	9	4	7	8	6	7	8	8	9	6	9	9		Donor1	1	2	1	2	1	1	0	0	0	1	1	1	1	0	2
Donor2	1	1	1	2	2	1	4	1	1	2	3	2	3	0	3		Donor2	7	8	5	9	10	10	6	10	11	8	9	8	8	8	10		Donor2	0	0	1	0	0	0	2	4	1	1	0	0	0	0	1
				CD8
		ILC1																	CD8/NKG2D																	PBMCPHA
Donor1	2	1	3	0	3	3	3	2	2	2	2	0	4	2	3		Donor1	6	12	17	13	8	10	7	12	13	12	12	6	15	5	17		Donor1	1	0	0	0	2	2	3	2	2	1	1	2	1	1	1
Donor2	3	2	4	3	3	3	2	2	2	3	5	2	3	0	3		Donor2	12	15	9	10	12	18	14	7	10	12	16	9	10	14	12		Donor2	1	1	2	1	0	2	2	1	1	1	1	1	0	2	2
Supp Figure4E
				ILC1
		ILC1																	CD8/NKG2D																	PBMCPHA
Donor1	9	3	7	8	9	6	6	9	10								Donor1	2	1	3	4	2	4	3	2	1	2	1	2					Donor1	1	1	1	0	0	0	2	3	2	1	0
Donor2	6	9	10	11	6	9	5	10									Donor2	2	0	0	2	4	2	1	0	0	3	2	3					Donor2	0	0	1	1	1	1	0	0	1	1	0
