# Supplementary material for: Involvement of ILC1-like innate lymphocytes in human autoimmunity, lessons from alopecia areata
Source: eLife. 2023 Mar 17;12:e80768. doi: 10.7554/eLife.80768 (PMC10023162; doi:10.7554/eLife.80768)
Supplement: Figure 7—source data 1. [file elife-80768-fig7-data1.xlsx]

## Sheet: Sheet1
Figure 7
Figure 7A
		ILC1 day0				ILC1day45						CD8/NKG2D day0				CD8/NKG2Dday45						PBMCs/PHA day0				PBMCs/PHAday45
Donor1	17	16	23			6	9	6		Donor1	14	20	12		8	12	6			Donor1	12	16	20		12	16	19
Donor2	12	10	7			5	0	5		Donor2	8	8			3	2				Donor2	5	17	10		5	18	10
Donor3	9	7	10			6	4	7		Donor3	14	4			4	3				Donor3	12	8			13	9
Figure 7F
			HLA ABC											HLA-DR											MSH											TGFbeta
		ILC1			CD8/NKG2D			PBMCs/PHA					ILC1			CD8/NKG2D			PBMCs/PHA					ILC1			CD8/NKG2D			PBMCs/PHA					ILC1			CD8/NKG2D			PBMCs/PHA
Donor1	61	56		50	48		18	14	17		Donor1	58	51		47	39		14	22			Donor1	2	1	3		2	1		8	19		Donor1	4	3	4		4	4		15	18
Donor2	49	64		57	53		21	20			Donor2	40	44		40	57		19	21			Donor2	3	2	2		0	2		12	6		Donor2	5	2	4		5	3		10	27
Donor3	47	38		50	44		17	24			Donor3	48	42		39	42		18	16			Donor3	3	1	1		1	1		20	10		Donor3	4	4	4		2	5		15	19
