# Supplementary material for: Involvement of ILC1-like innate lymphocytes in human autoimmunity, lessons from alopecia areata
Source: eLife. 2023 Mar 17;12:e80768. doi: 10.7554/eLife.80768 (PMC10023162; doi:10.7554/eLife.80768)
Supplement: Figure 8—source data 1. [file elife-80768-fig8-data1.xlsx]

## Sheet: Sheet1
Figure 8
Figure 8D
	Normal human scalp skin graft								Humanized AA intra follicular								Humanized AA peri follicular
		Eomes+CD49A+NKG2D+								Eomes+CD49A+NKG2D+								Eomes+CD49A+NKG2D+
Xenotransplant1	0	0					Xenotransplant1	2	1	2	1	1	0		Xenotransplant1	2	4	5	3	2
Xenotransplant2	0	0					Xenotransplant2	5	0	1	3	0	0		Xenotransplant2	3	4	4	3	6
Xenotransplant3	0	0	0	0			Xenotransplant3	1	1	7	0	2	0		Xenotransplant3	0	5	4	1	6
Xenotransplant4	1	0	0	0	0		Xenotransplant4	1	0	1	0	6	1		Xenotransplant4	3	0	3	1	1
Xenotransplant5	0	0	0	0	1		Xenotransplant5	0	0	2	2	2	1		Xenotransplant5	3	3	6	0	2
Xenotransplant6	0	1	0	1	0		Xenotransplant6	0	1	0	1	1	1		Xenotransplant6	4	0	0	0	3
		Eomes+CD49A+ckit-								Eomes+CD49A+ckit-								Eomes+CD49A+ckit-
Xenotransplant1	2	0	1	0	0		Xenotransplant1	1	1	0	1	3	0		Xenotransplant1	2	0	1	2
Xenotransplant2	0	0	0	0	0		Xenotransplant2	0	0	0	0	1	2		Xenotransplant2	3	0	2	2
Xenotransplant3	0	0	0	0	0		Xenotransplant3	0	2	0	2	4			Xenotransplant3	5	3	3	4
Xenotransplant4	0	0	0	0	0		Xenotransplant4	2	0	4	0				Xenotransplant4	4	0	5	2
Xenotransplant5	0	0	0	0	1		Xenotransplant5	0	4	0	2	2	0		Xenotransplant5	3	2	3	2	3
Xenotransplant6	0	1	0	1	0		Xenotransplant6	1	0	0	0	1	0		Xenotransplant6	1	0	0	1	3
		NKp44+CD103+Tbet-								NKp44+CD103+Tbet-								NKp44+CD103+Tbet-
Xenotransplant1	0	0	0	0			Xenotransplant1	2	1	1	3	2	2		Xenotransplant1	3	2	5	3	2
Xenotransplant2	1	0	0	0	0		Xenotransplant2	3	2	2	1	2	1		Xenotransplant2	2	3	6	4	4
Xenotransplant3	1	0	0	0	0		Xenotransplant3	3	1	3	1	5	2		Xenotransplant3	4	3	3	4	3
Xenotransplant4	0	0	0	0			Xenotransplant4	2	2	2	2	2	2		Xenotransplant4	2	2	2	5	3
Xenotransplant5	0	0	0	0			Xenotransplant5	1	1	3	2	2	2		Xenotransplant5	1	3	3	3	4
Xenotransplant6	0	0	0	0			Xenotransplant6	2	1	0	1	1	2		Xenotransplant6	3	2	2	0	0
Figure 8F
		CD8/NKG2D						CD8/NKG2D						CD8/NKG2D
		Intrafollicular						Perifollicular						Normal human scalp skin
Xenotransplant1	0	2	4	1		Xenotransplant1	5	7	8	9		Xenotransplant1	0	1	0	1
Xenotransplant2	1	2	2	0		Xenotransplant2	6	12	5	9		Xenotransplant2	0	0	0	1
Xenotransplant3	3	0	4	6		Xenotransplant3	4	14	5	7		Xenotransplant3	1	0	0	1
Xenotransplant4	3	4	3	4		Xenotransplant4	9	5	5	8		Xenotransplant4	0	0	0	0
Xenotransplant5	2	2	2	2		Xenotransplant5	10	8	5	4		Xenotransplant5	0	0	0	0
Xenotransplant6	1	1	4	2		Xenotransplant6	4	7	9	8		Xenotransplant6	1	0	0	0
